# Supplementary material
Source: MDPI journal article supplement (https://www.mdpi.com/2297-8739/10/4/228)
Supplement: s1 [file s1]

# Online Membrane Sampling for the Mass Spectrometric Analysis of Oil Sands Process Affected Water-Derived Naphthenic Acids in Real-World Samples

Joseph Monaghan <sup>1,2</sup>, Dylan Steenis <sup>1</sup>, Ian J. Vander Meulen <sup>3,4</sup>, Kerry M. Peru <sup>4</sup>, John V. Headley <sup>4</sup>, Chris G. Gill <sup>1,2,5,6</sup> and Erik T. Krogh <sup>1,2,\*</sup>

Text S1: Data processing for membrane partitioning of model NAs

Steady-state transport across a capillary hollow fibre membrane is described by Fick's Law with the formula (Crank, 1975; LaPack et al., 1990):

$$F_{SS} = \frac{2\pi L \times K_{PDMS} D_{PDMS}}{\ln\left(\frac{R_o}{R_i}\right)} \times C_{Aq}$$

Where  $F_{SS}$  is the flow across the membrane in moles or grams per unit time (to match units of  $C_{Aq}$ ). The remaining terms can be collected into three groups: (1) geometric terms (length, outer radius  $[R_o]$ , inner radius  $[R_i]$ ), (2) permeability terms for the membrane-analyte pair (partition constant  $[K_{PDMS}]$ , diffusion constant  $[D_{PDMS}]$ ), and (3) analyte concentration  $C_{Aq}$ . Selectivity is derived from the permeability terms, where permeability ( $P$ ) is defined as the product of the membrane partition constant and diffusion constant:

$$P = K_{PDMS} D_{PDMS}$$

Where  $D_{PDMS}$  is inversely related to the natural risetime ( $\tau$ ) of a given analyte across the membrane:

$$D \propto \frac{1}{\tau}$$

We have defined (Duncan et al., 2022) a conditional partition coefficient ( $K'_{PDMS}$ ) for a given analyte under a specific set of CP-MIMS experimental conditions (flowrate, acceptor phase, membrane geometry) as:

$$K'_{PDMS} = \left( \frac{[Analyte]_{Acceptor}}{[Analyte]_{Donor}} \right) \times \tau$$

Here, we use the relative permeation efficiency (PE; ratio of internal standard corrected calibration slope in aqueous donor phase [4-point] vs. that in the acceptor phase [1-point] within the linear dynamic range) to determine the first term:

$$PE = \frac{slope_{Donor}}{slope_{Acceptor}} = \frac{[Analyte]_{Acceptor}}{[Analyte]_{Donor}}$$

The natural risetime  $\tau$  is then calculated from signal risetime in response to a step-function increase in concentration in the aqueous donor phase using a pseudo first order model:

$$\ln\left(1 - \frac{S_t'}{S_{SS}}\right)$$

Where  $S_t$ , and  $S_{SS}$ , are the internal standard and baseline corrected signal intensity at time  $t$ , and at steady-state, respectively. A plot of this function over time over 20-90% of the signal rise yields a linear fit where  $\tau$  is given by the inverse slope. The conditional partition constant  $K'_{PDMS}$  appearing in Table 2 results from:

$$K'_{PDMS} = PE \times \tau$$

Note that these conditional partition constants ( $K'_{\text{PDMS}}$ ) are collected under a different set of conditions (flowrate, acceptor phase composition) from Duncan et al. (2022) and will therefore have different absolute values.

**Table S1.** Summary of  $m/z$  included in the ‘inclusion list’ strategy for OSPW-NAs calibration by CP-MIMS. This list was generated for the 2018 extract of OSPW.

| #  | $m/z$ | $R^2$ | #  | $m/z$ | $R^2$ | #  | $m/z$ | $R^2$ |
|----|-------|-------|----|-------|-------|----|-------|-------|
| 1  | 181   | 0.998 | 14 | 231   | 0.999 | 27 | 289   | 0.994 |
| 2  | 183   | 0.993 | 15 | 233   | 0.998 | 28 | 293   | 0.933 |
| 3  | 193   | 0.997 | 16 | 235   | 0.999 | 29 | 295   | 0.997 |
| 4  | 195   | 0.999 | 17 | 243   | 0.999 | 30 | 297   | 0.882 |
| 5  | 197   | 0.998 | 18 | 245   | 0.999 | 31 | 299   | 0.974 |
| 6  | 207   | 0.999 | 19 | 247   | 0.998 | 32 | 301   | 0.994 |
| 7  | 211   | 0.999 | 20 | 257   | 0.997 | 33 | 303   | 0.991 |
| 8  | 215   | 0.994 | 21 | 259   | 0.999 | 34 | 305   | 0.946 |
| 9  | 217   | 0.999 | 22 | 267   | 0.991 | 35 | 307   | 0.878 |
| 10 | 219   | 0.981 | 23 | 271   | 0.997 | 36 | 317   | 0.992 |
| 11 | 221   | 0.999 | 24 | 273   | 0.998 | 37 | 319   | 0.987 |
| 12 | 223   | 0.998 | 25 | 275   | 0.994 | 38 | 321   | 0.992 |
| 13 | 229   | 0.990 | 26 | 285   | 0.993 | 39 | 331   | 0.994 |

**Table S2.** Class composition for direct infusion and membrane permeate across 4 OSPW extracts shown in figure 2.

| Class           | 2018 Extract    |                   | 2015/1 Extract  |            | 2015/2 Extract  |            | 2013 Extract    |            |
|-----------------|-----------------|-------------------|-----------------|------------|-----------------|------------|-----------------|------------|
|                 | Direct Infusion | CP-MIMS           | Direct Infusion | CP-MIMS    | Direct Infusion | CP-MIMS    | Direct Infusion | CP-MIMS    |
| O <sub>2</sub>  | 34.7 ± 0.6      | 85.9 ± 1.8        | 62.6 ± 0.9      | 92.8 ± 0.6 | 43.7 ± 1.7      | 87.9 ± 0.8 | 54.3 ± 0.8      | 94.8 ± 1.3 |
| O <sub>3</sub>  | 24.4 ± 0.6      | 4.1 ± 0.8         | 13.6 ± 0.6      | 0.7 ± 0.1  | 21.5 ± 2.8      | 2.5 ± 0.8  | 18.9 ± 0.6      | 2 ± 0.4    |
| O <sub>4</sub>  | 21.1 ± 0.6      | 0.2 ± 0.2         | 10.3 ± 0.7      | 0.1 ± 0    | 18 ± 2.2        | 1.8 ± 0.3  | 16.1 ± 0.6      | 1.1 ± 0.2  |
| SO <sub>2</sub> | 5.5 ± 0.2       | 9.4 ± 0.8         | 5.4 ± 0.3       | 6.1 ± 0.2  | 4.8 ± 0.3       | 7.1 ± 0.3  | 1.5 ± 0.1       | 1.3 ± 0.2  |
| SO <sub>3</sub> | 7.9 ± 0.2       | n.d. <sup>1</sup> | 5.4 ± 0.2       | n.d.       | 5.6 ± 0.4       | n.d.       | 6 ± 0.3         | n.d.       |
| SO <sub>4</sub> | 2.3 ± 0.2       | n.d.              | 1.1 ± 0.2       | n.d.       | 2.4 ± 1.6       | n.d.       | 1.3 ± 0.2       | n.d.       |
| O <sub>5</sub>  | 2.6 ± 0.2       | n.d.              | 0.8 ± 0.2       | n.d.       | 1.8 ± 0.5       | n.d.       | 1 ± 0.2         | n.d.       |
| Σ               | 98.5            | 99.6              | 99.2            | 99.7       | 97.8            | 99.3       | 99.1            | 99.2       |

<sup>1</sup>n.d. = no detect

**Table S3.** Relative calibration slope for various NA mixtures using CP-MIMS with a unit-mass resolution quadrupole-MS.

| NA mixture     | Average slope | SD  | O <sub>2</sub> -weighted slope | SD   | $n$ | Normalized slope |
|----------------|---------------|-----|--------------------------------|------|-----|------------------|
| Sigma-Aldrich  | 6.5           | --  | 6.9                            | --   | 1   | 0.65             |
| Merichem       | 10.1          | 1.0 | 10.3                           | 1.02 | 4   | 1.00             |
| 2018 Extract   | 1.4           | 0.1 | 4.1                            | 0.18 | 3   | 0.14             |
| 2015/1 Extract | 1.9           | --  | 3.1                            | --   | 1   | 0.19             |
| 2015/2 Extract | 1.4           | --  | 3.2                            | --   | 1   | 0.14             |

**Table S4.** Evaluation of O<sub>2</sub> contribution to signal intensity at nominal mass resolution for an average of the 4 OSPW extracts shown in Figure 2.

| <i>m/z</i> | % O <sub>2</sub> |                   |                   |                 | <i>m/z</i> | % O <sub>2</sub> |                   |                   |                 | <i>m/z</i> | % O <sub>2</sub> |                   |                   |                 |
|------------|------------------|-------------------|-------------------|-----------------|------------|------------------|-------------------|-------------------|-----------------|------------|------------------|-------------------|-------------------|-----------------|
|            | 2018<br>Extract  | 2015/1<br>Extract | 2015/2<br>Extract | 2013<br>Extract |            | 2018<br>Extract  | 2015/1<br>Extract | 2015/2<br>Extract | 2013<br>Extract |            | 2018<br>Extract  | 2015/1<br>Extract | 2015/2<br>Extract | 2013<br>Extract |
| 101        | --               | --                | --                | --              | 187        | 100              | --                | --                | --              | 273        | 82.3             | 87.8              | 89.5              | 86.7            |
| 103        | --               | --                | --                | --              | 189        | 100              | 100               | --                | --              | 275        | 71.0             | 71.1              | 82.2              | 75.4            |
| 105        | --               | --                | --                | --              | 191        | 27.4             | 100               | 100               | 55.0            | 277        | 62.4             | 79.5              | 76.8              | 72.3            |
| 107        | --               | --                | --                | --              | 193        | 100              | 100               | 100               | 100             | 279        | 19.0             | 27.1              | 0                 | 17.3            |
| 109        | --               | --                | --                | 100             | 195        | 100              | 100               | 100               | 100             | 281        | 4.3              | 8.2               | 24.7              | 1.7             |
| 111        | --               | --                | --                | --              | 197        | 100              | 100               | 100               | 100             | 283        | 89.4             | 67.7              | 96.1              | 74.6            |
| 113        | --               | --                | --                | --              | 199        | --               | --                | --                | --              | 285        | 92.3             | 94.7              | 94.7              | 93.0            |
| 115        | --               | --                | --                | --              | 201        | 100              | 100               | --                | --              | 287        | 57.6             | 67.2              | 73.2              | 63.9            |
| 117        | 0                | --                | --                | --              | 203        | 93.7             | 100               | 100               | 48.5            | 289        | 36.4             | 36.5              | 52.4              | 36.9            |
| 119        | --               | --                | --                | --              | 205        | 100              | 99                | 100               | 100             | 291        | 19.3             | 34.6              | 56.9              | 25.7            |
| 121        | --               | --                | --                | --              | 207        | 99.7             | 100               | 100               | 99.9            | 293        | 3.1              | 0                 | 0                 | 0               |
| 123        | --               | --                | --                | --              | 209        | 100              | 100               | 100               | 100             | 295        | 16.6             | 14.5              | 40.3              | 7.0             |
| 125        | 0                | --                | --                | --              | 211        | 99.7             | 100               | 100               | 100             | 297        | 97.3             | 83                | 100               | 90.4            |
| 127        | --               | --                | --                | --              | 213        | 0                | 0                 | 0                 | 0               | 299        | 84.8             | 87.8              | 90.7              | 87.4            |
| 129        | 100              | --                | --                | --              | 215        | 97.8             | 100               | 100               | 100             | 301        | 31.4             | 42.9              | 48.8              | 38.1            |
| 131        | --               | --                | --                | --              | 217        | 99.3             | 100               | 100               | 100             | 303        | 1.6              | 5.0               | 0                 | 2.0             |
| 133        | --               | --                | --                | --              | 219        | 98.9             | 99                | 100               | 99.2            | 305        | 0                | 0                 | 5.3               | 0               |
| 135        | --               | --                | --                | --              | 221        | 99.6             | 100               | 99.8              | 99.8            | 307        | 0                | 0                 | 7.8               | 0               |
| 137        | --               | --                | --                | 0               | 223        | 97.9             | 99.9              | 98.7              | 97.5            | 309        | 22.6             | 7.4               | 24.7              | 4.7             |
| 139        | --               | --                | --                | --              | 225        | 2.1              | 99.1              | --                | 0               | 311        | 98.9             | 97.3              | 100               | 98.9            |
| 141        | --               | --                | --                | --              | 227        | 0                | 0                 | --                | 0               | 313        | 57.4             | 76.7              | 92.0              | 77.3            |
| 143        | 100              | 100               | 100               | 100             | 229        | 99.7             | 100               | 100               | 94.6            | 315        | 12.9             | 20.7              | 22.6              | 17.3            |
| 145        | --               | --                | --                | --              | 231        | 98.2             | 100               | 100               | 98.9            | 317        | 0                | 0                 | 0                 | 0.9             |
| 147        | 0                | --                | 0                 | 9.6             | 233        | 97.9             | 99.4              | 99.2              | 98.7            | 319        | 0                | 0                 | 0                 | 0               |
| 149        | 0                | --                | --                | 0               | 235        | 99               | 99.9              | 99.5              | 99.5            | 321        | 0                | 0                 | 35.6              | 0               |
| 151        | 0                | --                | --                | 0               | 237        | 94.4             | 99.9              | 97.4              | 98              | 323        | 41.9             | 9.8               | 3.0               | 4.3             |
| 153        | --               | --                | --                | --              | 239        | 6.3              | 22.2              | 9.0               | 8.8             | 325        | 97.4             | 100               | 100               | 90.5            |
| 155        | --               | --                | --                | --              | 241        | 64               | 60.7              | 85.4              | 59.3            | 327        | 34.7             | 46.8              | 77.0              | 39.3            |
| 157        | --               | --                | 100               | 100             | 243        | 99.9             | 100               | 100               | 100             | 329        | 0                | 0                 | 0                 | 0               |

|     |      |     |     |      |     |      |      |      |      |     |      |     |     |      |
|-----|------|-----|-----|------|-----|------|------|------|------|-----|------|-----|-----|------|
| 159 | --   | --  | --  | --   | 245 | 95.7 | 99.3 | 99   | 97.8 | 331 | 0    | 0   | 0   | 0    |
| 161 | 74.6 | --  | --  | 100  | 247 | 96.3 | 97.5 | 99.1 | 97.5 | 333 | 0    | 0   | 0   | 0    |
| 163 | 0    | --  | --  | 0    | 249 | 96.8 | 99.5 | 99.4 | 98.3 | 335 | 7.3  | 0   | 0   | 0    |
| 165 | --   | --  | --  | --   | 251 | 82.2 | 96.9 | 91.6 | 92.2 | 337 | 52.2 | 0   | 0   | 4.1  |
| 167 | --   | --  | --  | --   | 253 | 9.0  | 18.3 | 17.9 | 11.7 | 339 | 94.9 | 100 | 100 | 95.5 |
| 169 | --   | 100 | --  | --   | 255 | 69.2 | 64   | 88.3 | 65.3 | 341 | 16.7 | 100 | --  | 29.0 |
| 171 | 37.4 | --  | --  | 100  | 257 | 99.4 | 100  | 100  | 99.9 | 343 | 0    | 0   | 0   | 0    |
| 173 | --   | --  | --  | --   | 259 | 92.4 | 95.4 | 96.4 | 94.6 | 345 | 0    | 0   | 0   | 0    |
| 175 | --   | --  | --  | 0    | 261 | 89.1 | 91   | 95.7 | 92.6 | 347 | 14.4 | --  | 0   | 0    |
| 177 | 0    | --  | --  | 100  | 263 | 88.4 | 97   | 95.7 | 93.5 | 349 | 0    | 0   | 0   | 0    |
| 179 | 0    | 100 | 100 | 40.9 | 265 | 42.1 | 68.1 | 55.3 | 51.3 | 351 | 6    | 0   | 0   | 1.6  |
| 181 | 100  | 100 | 100 | 100  | 267 | 10.6 | 15.5 | 64.0 | 8.5  | 353 | 0    | --  | --  | --   |
| 183 | 97.5 | 100 | 100 | 100  | 269 | 77.4 | 66.3 | 96.4 | 71.3 | 355 | --   | --  | --  | --   |
| 185 | 100  | 100 | 100 | 100  | 271 | 97.7 | 98.7 | 99.6 | 98   |     |      |     |     |      |

\*Channels with known background interference or < 85% O<sub>2</sub> contribution are indicated in red and are excluded from the quantitative comparison shown in figure 5.

**Table S5.** Summary of quantitative data for archived samples measured by SPE-HRMS and CP-MIMS with a unit mass resolution quadrupole MS.

| Sample Name                | Class | [NAFCs] by<br>SPE-HRMS <sup>1</sup><br>(mg/L) | [O <sub>2</sub> -NAs] by<br>SPE-HRMS <sup>2</sup><br>(mg/L) | [O <sub>2</sub> -NAs] by CP-<br>MIMS <sup>1</sup><br>(mg/L) | SD<br>(CP-MIMS; mg/L) | <i>n</i><br>(CP-<br>MIMS) |
|----------------------------|-------|-----------------------------------------------|-------------------------------------------------------------|-------------------------------------------------------------|-----------------------|---------------------------|
| 2021-W-0159                | CW-2  | 22.6                                          | 15.3                                                        | 6.9                                                         | 0.3                   | 3                         |
| 2021-W-0327                | OSPW  | 20.6                                          | 3.8                                                         | 1.2                                                         | 0.5                   | 3                         |
| 2021-W-0328                | OSPW  | 21.1                                          | 3.8                                                         | 1.2                                                         | --                    | 1                         |
| 2021-W-0329                | OSPW  | 16.9                                          | 3.6                                                         | 1.3                                                         | --                    | 1                         |
| 2021-W-0330                | OSPW  | 19.6                                          | 3.7                                                         | 1.8                                                         | --                    | 1                         |
| 2021-W-0331                | CW-2  | 27.2                                          | 7.4                                                         | 3.4                                                         | --                    | 1                         |
| 2021-W-0332                | CW-2  | 27.2                                          | 7.9                                                         | 3.7                                                         | --                    | 1                         |
| 2021-W-0333                | CW-2  | 24.5                                          | 3.7                                                         | 0.8                                                         | 0.3                   | 3                         |
| 2021-W-0334                | CW-2  | 23.5                                          | 5.3                                                         | 1.5                                                         | 0.3                   | 3                         |
| 2021-W-0447                | CW-1  | 9.8                                           | 5.4                                                         | 9.8                                                         | 0.5                   | 3                         |
| 2021-W-0448                | CW-1  | 7.6                                           | 4.8                                                         | 7.4                                                         | --                    | 1                         |
| 2021-W-0642                | CW-1  | 35.4                                          | 22.1                                                        | 18.3                                                        | 2.5                   | 3                         |
| 2021-W-0645                | CW-1  | 41.8                                          | 25.8                                                        | 19.7                                                        | 2.1                   | 4                         |
| 2021-W-0662                | CW-1  | 28.5                                          | 17.1                                                        | 23.3                                                        | 1.4                   | 3                         |
| 2021-W-0667                | CW-1  | 41.5                                          | 22.6                                                        | 26.9                                                        | --                    | 1                         |
| 2022-W-0095                | Env   | 10.6                                          | 1                                                           | 1.0                                                         | --                    | 1                         |
| 2022-W-0096                | Env   | 94.7                                          | 17.1                                                        | 10.9                                                        | --                    | 1                         |
| 2022-W-0098                | Env   | 30.1                                          | 8.8                                                         | 6.2                                                         | --                    | 1                         |
| 2022-W-0099                | Env   | 28.7                                          | 8.7                                                         | 6.4                                                         | 0.3                   | 3                         |
| 2017-415-<br>TowerRoadJH05 | Env   | 3.3                                           | 0.1                                                         | 0.0                                                         | --                    | 2                         |
| 2017-458-JH48              | Env   | 1.1                                           | 0                                                           | 0.0                                                         | --                    | 2                         |
| 2017-460-JH50              | Env   | 7.4                                           | 0.3                                                         | 0.0                                                         | 0.0                   | 2                         |
| 2016-A-2097-<br>MRM-DP14   | Env   | 11.1                                          | 7.5                                                         | 8.4                                                         | --                    | 1                         |
| 2017-A-451-JH40            | Env   | 8.6                                           | 0.7                                                         | 0.0                                                         | 0.1                   | 2                         |
| 2016-A-2096-<br>RWC-Pump   | Env   | 46.8                                          | 24.1                                                        | 11.7                                                        | 0.0                   | 2                         |
| 2017-462-JH52              | Env   | 6.6                                           | 0.3                                                         | 0.2                                                         | 0.3                   | 3                         |
| 2016-A-2092-<br>JMP-ETF    | Env   | 26.8                                          | 11.5                                                        | 5.9                                                         | 0.6                   | 3                         |
| 2016-A-2098-<br>MRM-ETF    | Env   | 38.2                                          | 22                                                          | 14.0                                                        | 2.4                   | 3                         |

<sup>1</sup>Reflects weighting by O<sub>2</sub> contribution of calibrant (adjusted [NA]<sub>T</sub> = measured [NA]<sub>T</sub> × f<sub>O2</sub> ). This results in a factor of 0.347 for CP-MIMS results and 0.745 for SPE-HRMS results.

<sup>2</sup>Calculated as [NAFCs] × f<sub>O2</sub> from SPE-HRMS data.

## Small

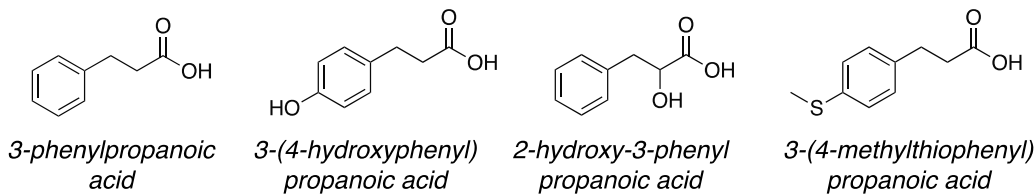

## Medium

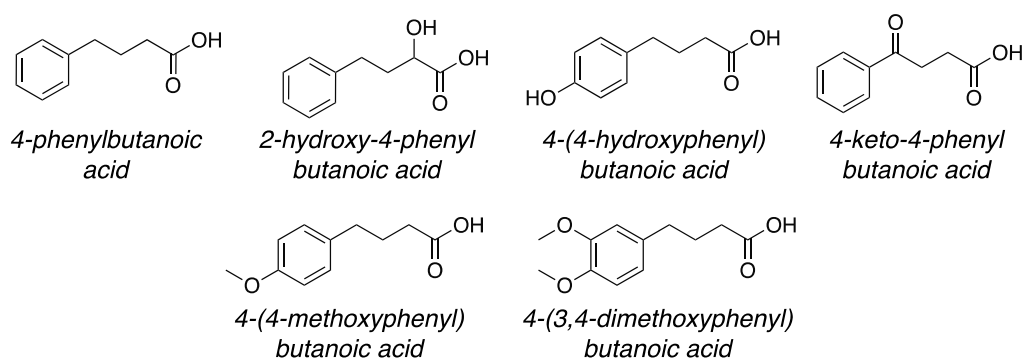

## Large

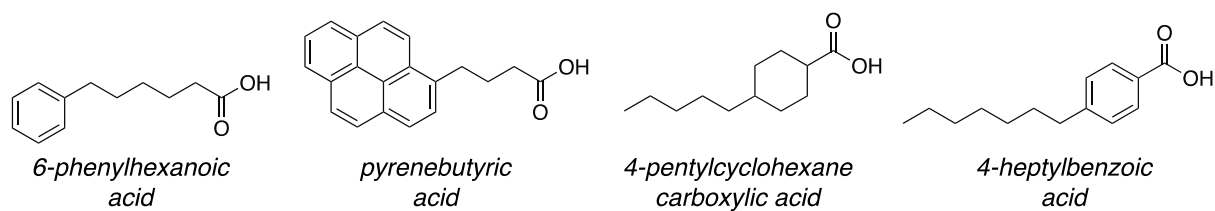

**Figure S1.** Structures of model compounds shown employed to evaluate membrane permeability.

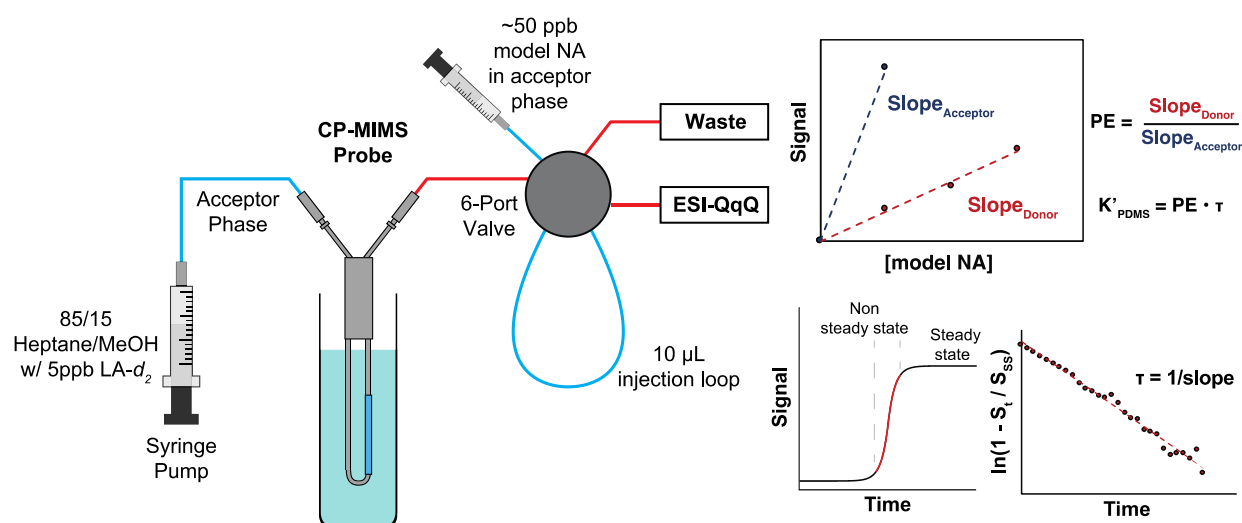

**Figure S2.** Schematic overview of experimental workflow and data processing to evaluate permeability of model NAs/NAFCs. A calibration curve is measured in both the sample (donor) phase and acceptor phase by spiking model NA into the sample phase or direct infusion, respectively. The permeation efficiency is then taken as the ratio of these two slopes. The natural risetime ( $\tau$ ) is taken as 1/slope of the linearized risetime data ( $\ln[1 - \text{Signal}_t / \text{Signal}_{ss}]$ ). The conditional membrane partitioning constant  $K'_{\text{PDMS}}$  is then calculated as the product of the natural risetime and the permeation efficiency. All permeation studies were performed in triplicate.

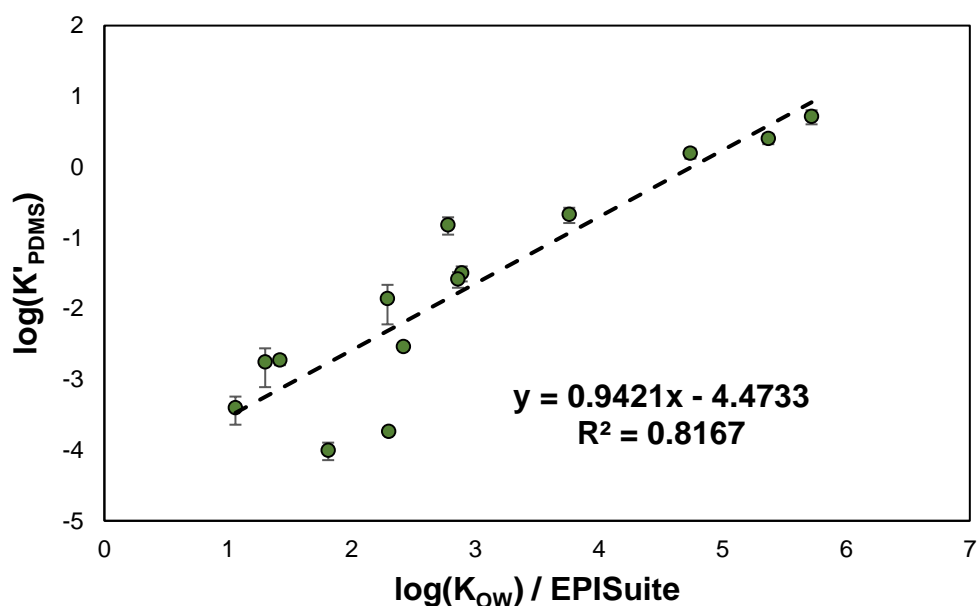

**Figure S3.** Measured membrane partition coefficient ( $K'_{\text{PDMS}}$ ) vs. calculated  $K_{\text{OW}}$  by EPISuite (Chemspider.com).

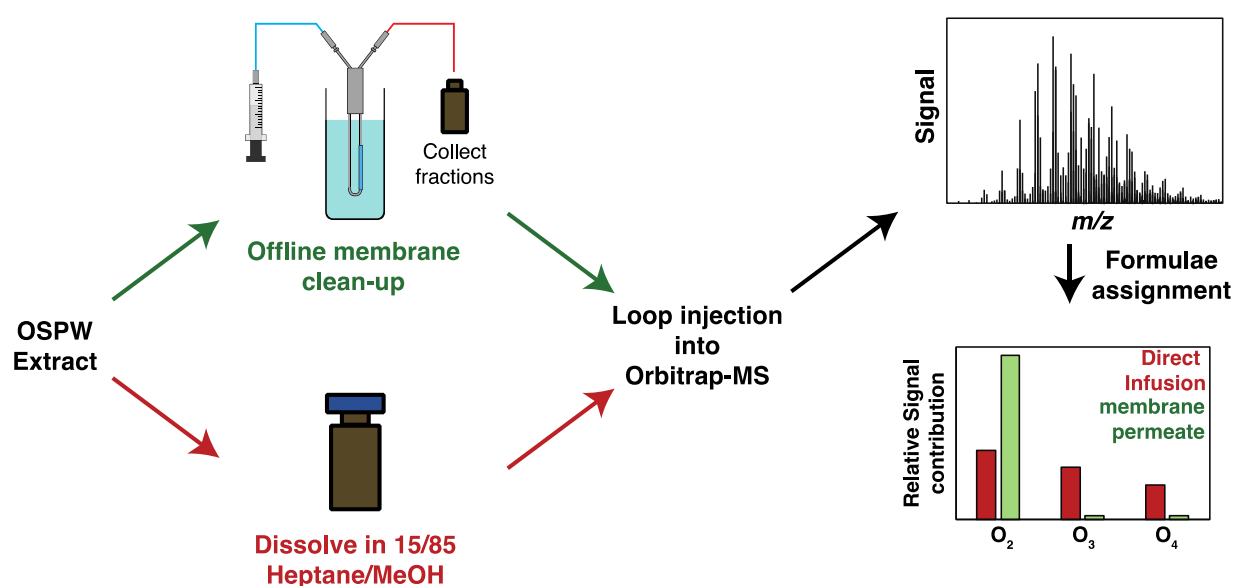

**Figure S4.** Schematic Overview of experiments evaluating composition OSPW both with (green) and without (red) membrane clean-up. For direct infusion experiments, OSPW extracts are diluted to ca. 2 mg/kg in methanol and loop-injected into the Orbitrap. For the membrane permeate, offline fractions are collected from OSPW extracts spiked into water at ca. 2 mg/L. These fractions are then directly infused into the MS. Formulae assignment was performed using custom Matlab scripts, and then the average signal composition from triplicate injections were averaged. Note that the bar chart does not present data for an actual OSPW, see Figure 3 and Table S2 for the composition of all four OSPW extracts.

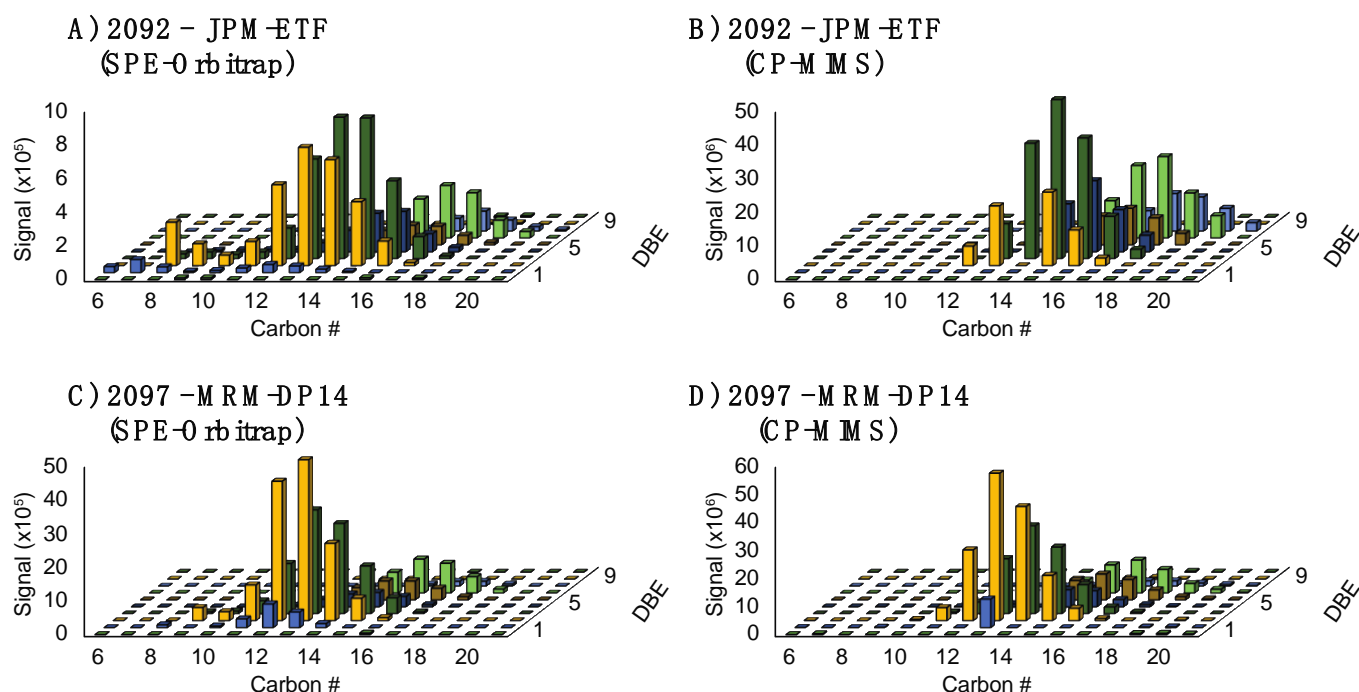

**Figure S5.** O<sub>2</sub>-class distribution for two environmental samples analyzed by SPE-Orbitrap (A & C) and CP-MIMS (B & D). While some differences are observable for minor components of the mixture (possibly due to noise and/or dilution effects), the overall profile is conserved with direct membrane sampling.



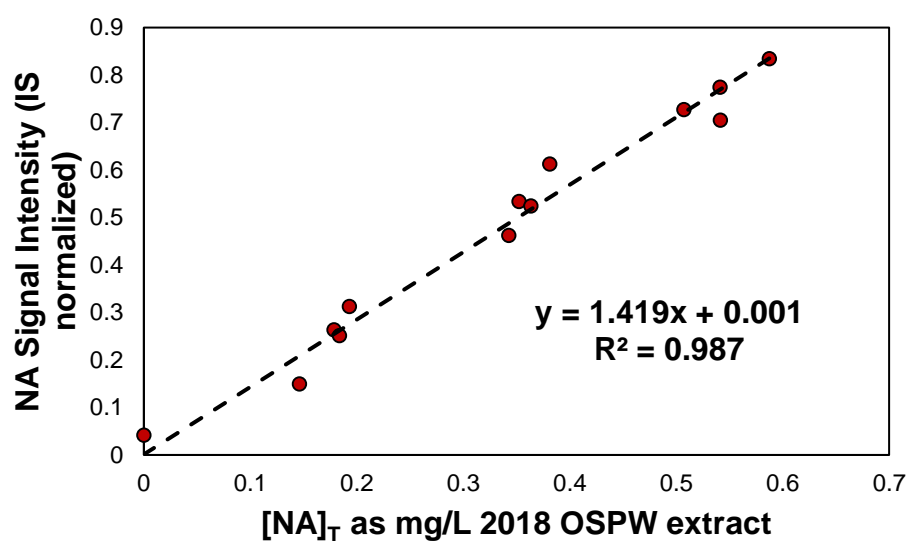

**Figure S6.** Calibration curve for 2018 OSPW extract of NAs by CP-MIMS with a unit mass resolution quadrupole mass spectrometer.

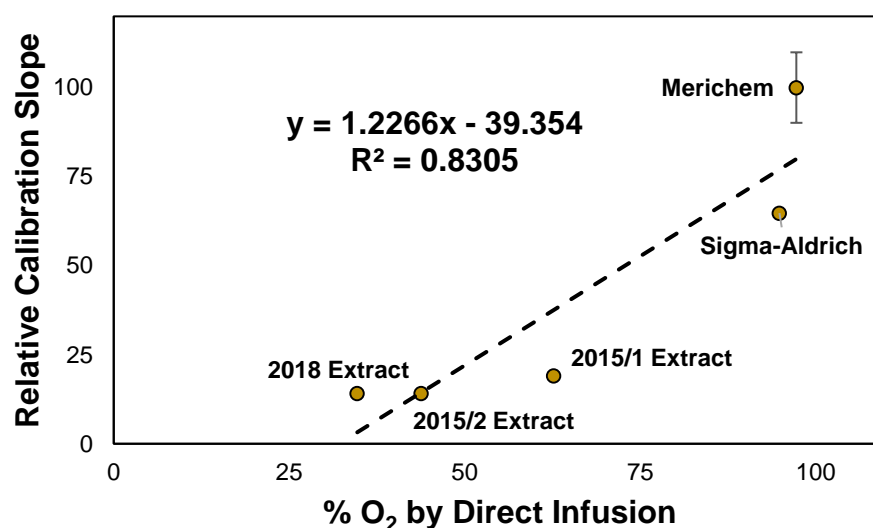

**Figure S7.** Relative calibration slope (%) using the developed QqQ method versus proportion of O<sub>2</sub>-NAs by direct infusion Orbitrap HRMS. Generally, higher O<sub>2</sub> proportions yielded higher relative calibration slopes however the relationship is non-linear, possibly due to differing ionization efficiencies between the mixtures.

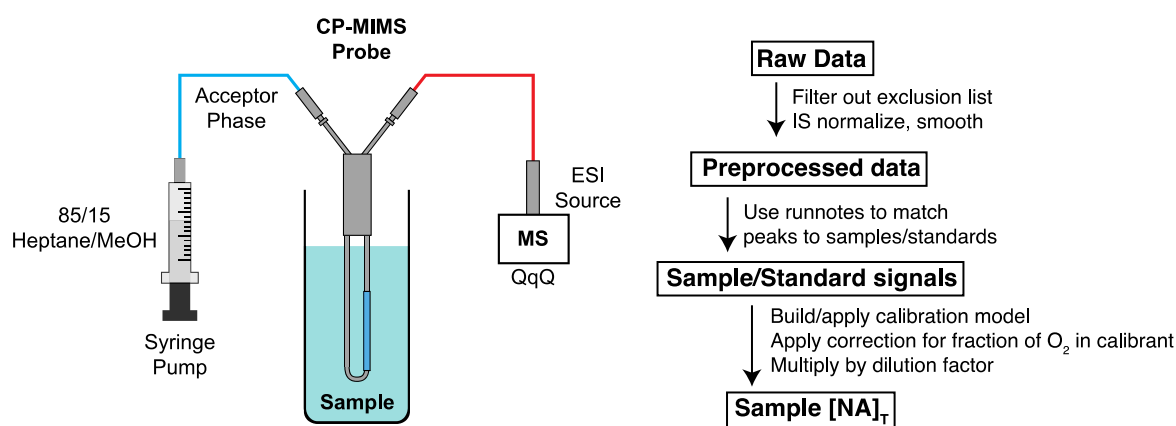

**Figure S8.** Schematic overview of experimental workflow and data workup for quantitative analysis of real-world samples by CP-MIMS. Samples are acidified to pH < 3 and diluted into the working calibration range of the method. Samples are then measured with the CP-MIMS probe coupled directly to a unit-mass resolution triple quadrupole MS. Raw data is then preprocessed as specified. Signal intensities are extracted from the preprocessed data, and a calibration model is built and applied with the 2018 extract of OSPW. Observed sample concentrations are then adjusted by a factor of 0.347 to compensate for the relative abundance of O<sub>2</sub> NAs in the 2018 extract used as calibrant. Finally, these concentrations are multiplied by the sample dilution factor to output the final quantitative results shown in Figure 5.

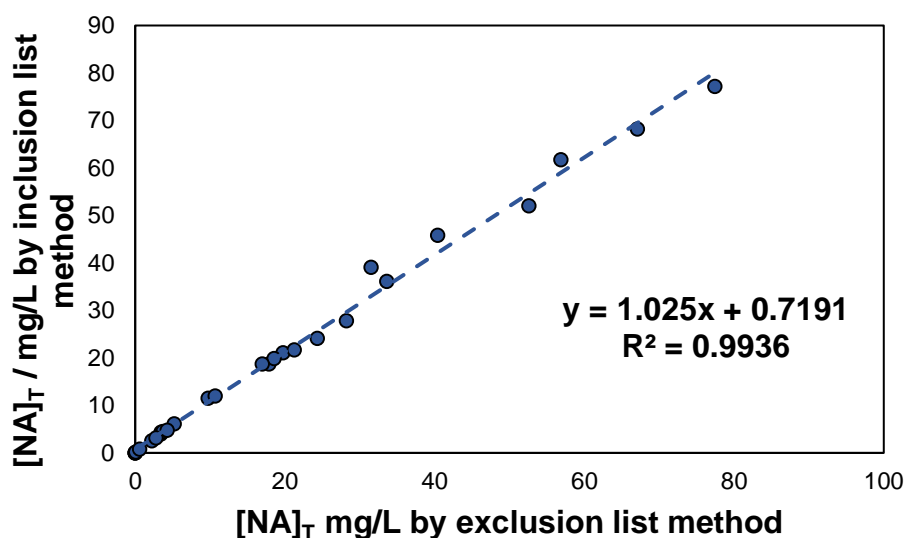

**Figure S9.** Comparison of quantitation using the 'exclusion list' and 'inclusion list' CP-MIMS methods. Results are generally comparable between the two approaches, however the new 'exclusion list' approach is more adaptable, allowing for direct intercomparison between calibrants (Figure S7). Note that these results are not weighted by the O<sub>2</sub> contribution in the calibrant, as the same calibrant was used for both methods (2018 OSPW extract).

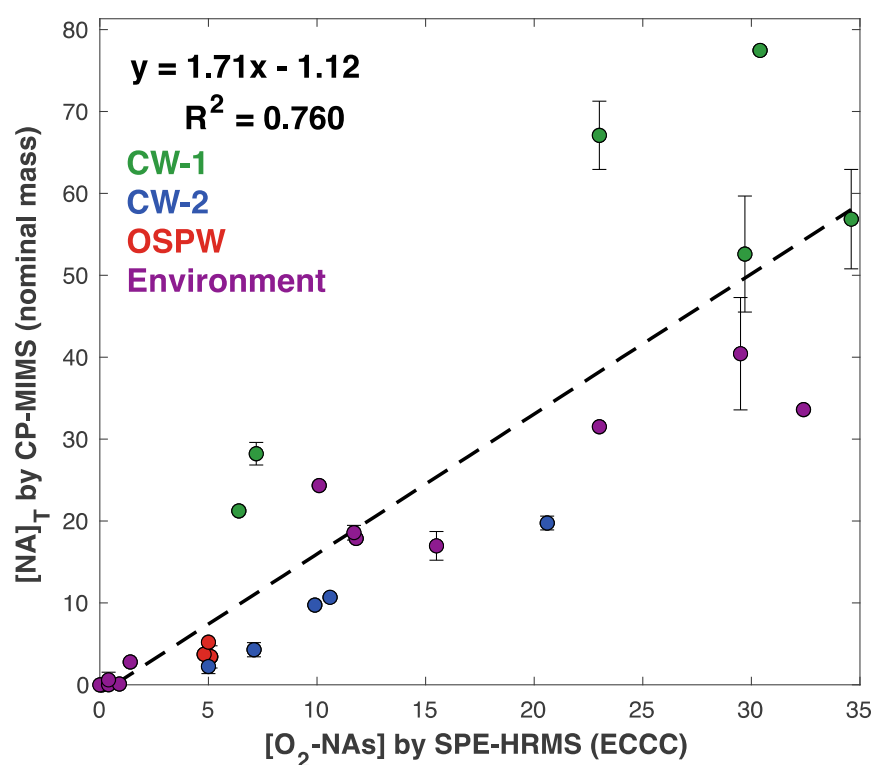

**Figure S10.** Comparison of un-weighted quantitative results derived from solid-phase extraction high resolution mass spectrometry and CP-MIMS paired to a nominal mass instrument. Quantitative precision on the SPE-HRMS data is estimated at  $\pm 10\%$  from the propagated error of replicate injections and formulae assignment. CP-MIMS results appear positively biased due to the lower  $O_2$  contribution present in the 2018 extract employed (34.7% vs. 74.5% in the SPE-HRMS calibrant).

#### References:

- Chemspider. Chemspider. 2022. Royal Society of Chemistry.
- Crank J. The Mathematics of Diffusion. London: Oxford University Press, 1975.
- Duncan KD, Hawkes JA, Berg M, Clarijs B, Gill CG, Bergquist J, Lanekoff I, Krogh ET. 2022. Membrane Sampling Separates Naphthenic Acids from Biogenic Dissolved Organic Matter for Direct Analysis by Mass Spectrometry. *Environ Sci Technol.* 56, 3096-3105. 10.1021/acs.est.1c07359
- LaPack MA, Tou JC, Enke CG. 1990. Membrane mass spectrometry for the direct trace analysis of volatile organic compounds in air and water. *Analytical Chemistry.* 62, 1265-1271. 10.1021/ac00212a013
